# Supplementary material for: Luminescence properties of Eu3+ -activated SrWO4 nanophosphors- Concentration and Annealing effect.
Source: Royal Society of Chemistry journal article supplement (doi:10.1039/c4ra05903d), 2014-01-01
Supplement: c4ra05903d1.pdf [file c4ra05903d1.pdf]

## Electronic Supplementary Information

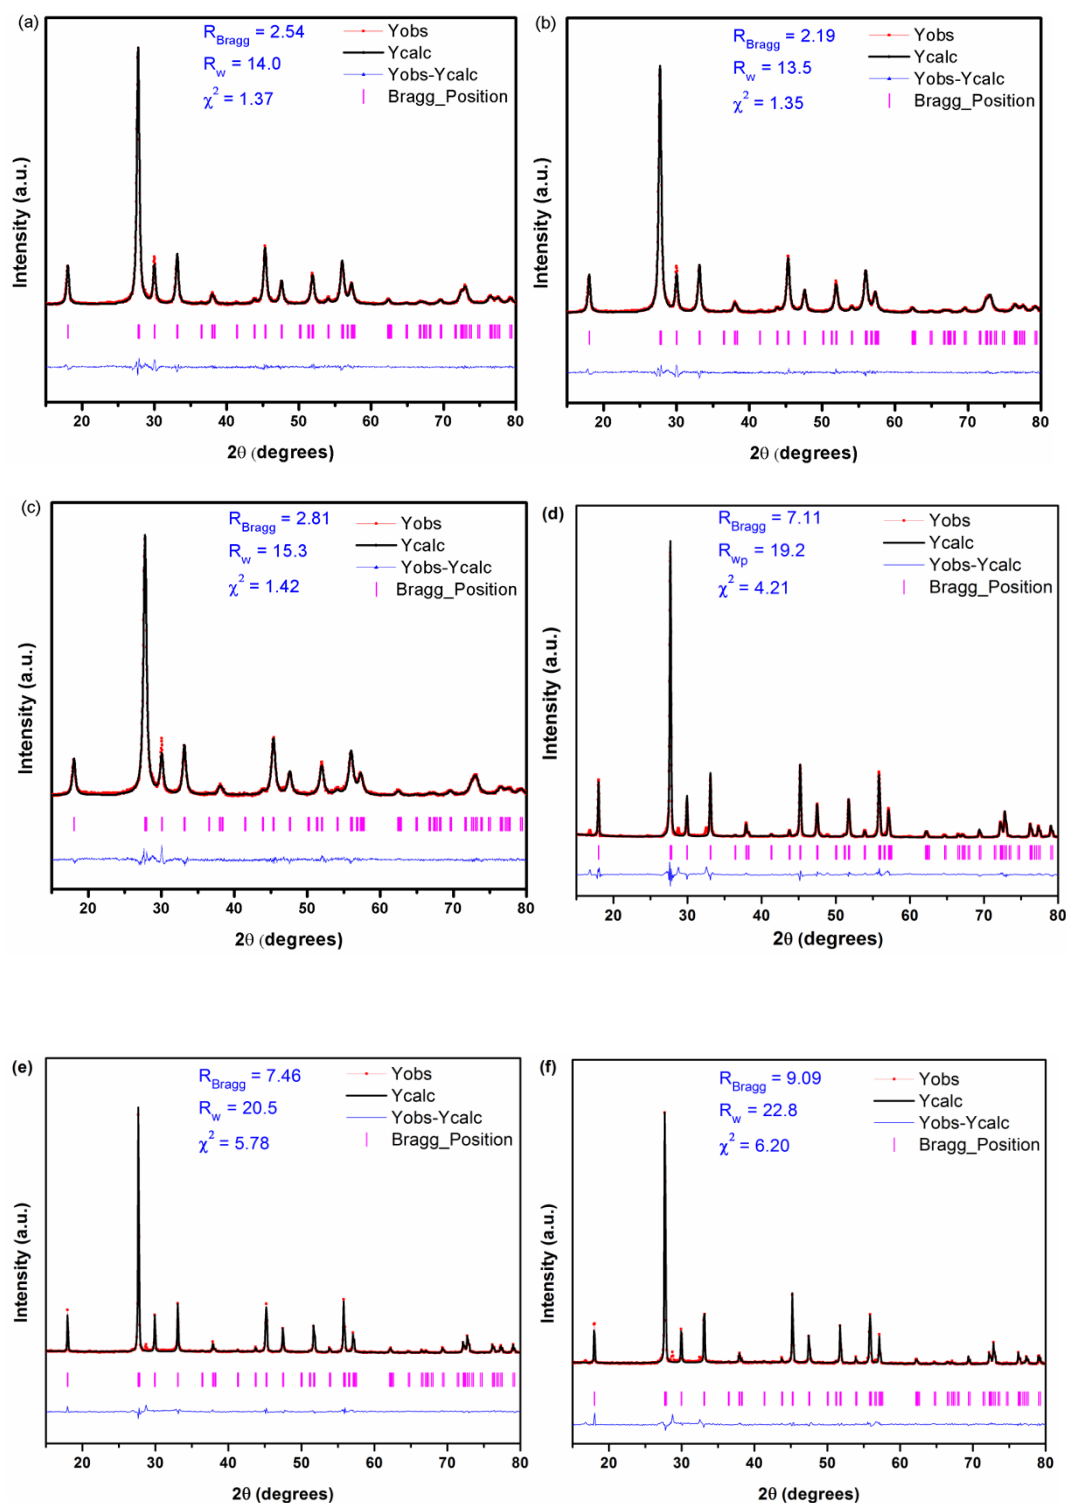

**Fig. S1** Rietveld plots of (a-c) as-prepared  $\text{Eu}^{3+}$  ( $\text{Eu}^{3+} = 5, 7$  and  $10$  at.%) and (d-f) annealed at  $900^\circ\text{C}$  ( $\text{Eu}^{3+} = 5, 7$  and  $10$  at.%) doped  $\text{SrWO}_4$  samples.

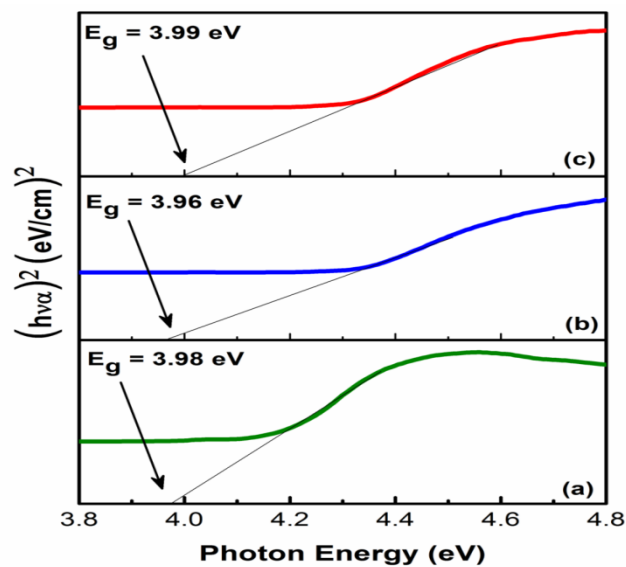

**Fig. S2** Plot of  $(\alpha hv)^2$  vs  $hv$  curve for 900 °C annealed (a) 5 at.%, (b) 7 at.% and (c) 10 at.%  $\text{Eu}^{3+}$ -doped  $\text{SrWO}_4$  nanophosphors.

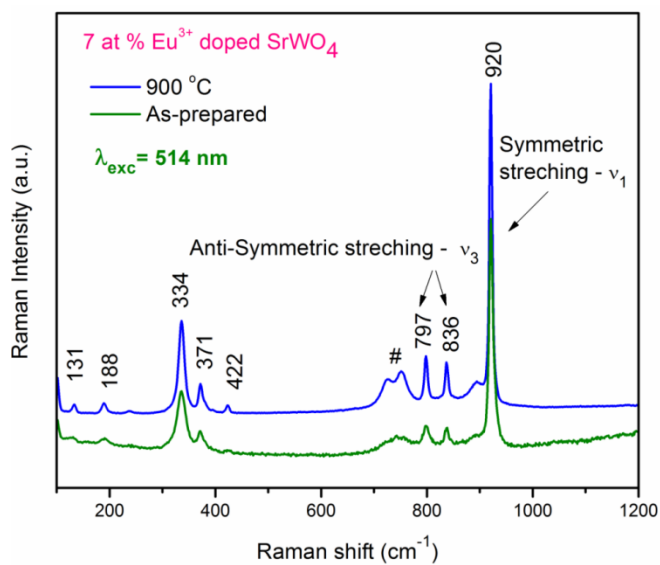

**Fig. S3** Raman spectra of as-prepared and 900 °C annealed samples of 7 at.%  $\text{Eu}^{3+}$ -doped  $\text{SrWO}_4$  at 514 nm excitation.

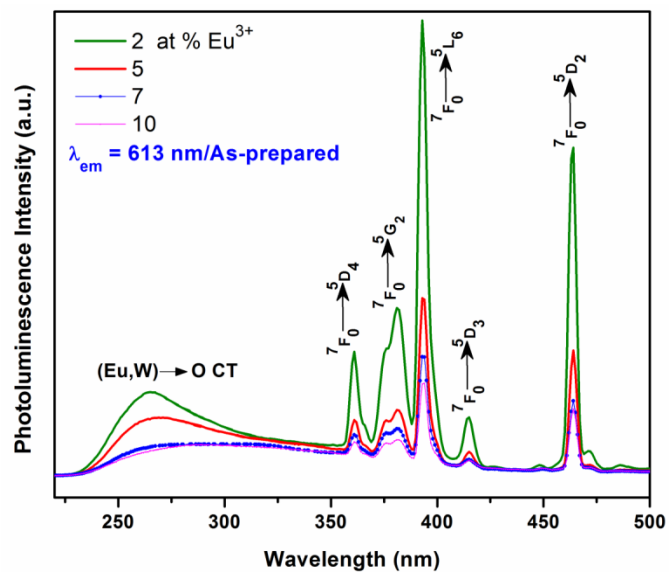

**Fig. S4** Excitation spectra of as-prepared  $\text{Eu}^{3+}$  ( $\text{Eu}^{3+} = 2, 5, 7$  and  $10$  at.%) doped  $\text{SrWO}_4$  nanoparticles at  $266 \text{ nm}$  excitation.
